# Supplementary material for: Impaired function and delayed regeneration of dendritic cells in COVID-19
Source: PLoS Pathog. 2021 Oct 6;17(10):e1009742. doi: 10.1371/journal.ppat.1009742 (PMC8523079; doi:10.1371/journal.ppat.1009742)
Supplement: S2 Table — (XLSX) [file ppat.1009742.s011.xlsx]

## Sheet: Sheet1
Panel 1: Cryo Activation Cohort				Panel 2: Age effect ACE2 cohort				Panel 3: Ki67 Cohort				Panel 4: Progenitor Cohort				Panel 5: Coculture sorting panel				Panel 6: Coculture analysis Panel				Panel 7: T/B				Panel 8: T/B 2				Panel 9: T/B old vs young
Marker	Company	Clone		Marker	Company	Clone		Marker	Company	Clone		Marker	Company	Clone		Marker	Company	Clone		Marker	Company	Clone		Marker	Company	Clone		Marker	Company	Clone		Marker	Company	Clone
AXL	R&D Systems	Axl		ACE2	NovusBiologicals	AC384		AXL	R&D Systems	Axl		CD115	Biolegend	9-4D2-1E4		CD11c	Biolegend	Bu15		CD11c	Biolegend	Bu15		CD3	Biolegend	UCHT1		CD3	Biolegend	UCHT1		CD3	Biolegend	UCHT1
CCR2	BD	LS132.1D9		AXL	R&D Systems	Axl		CD123	Invitrogen	6H6		CD117	Biolegend	104D2		CD14	Biolegend	M5E2		CD14	Biolegend	M5E2		CD4	Biolegend	OKT4		CD4	BD	1G1		CD4	Biolegend	OKT4
CD123	Invitrogen	6H6		CCR2	BD	LS132.1D9		CD14	Biolegend	M5E2		CD123	Biolegend	6H6		CD141	Biolegend	M80		CD3	Biolegend	SK7		CD8	Milltenyi	BW135/8ß		CD8	Milltenyi	BW135/8ß		CD8	Milltenyi	BW135/8ß
CD14	Biolegend	M5E2		CD11c	Biolegend	44442		CD141	Biolegend	M80		CD127	Biolegend	A019D5		CD15	Biolegend	HI98		CD38	Biolegend	HIT2		CD45RA	Biolegend	HI100		CD45RA	Biolegend	HI100		CD45RA	Biolegend	HI100
CD141	Biolegend	M80		CD123	Invitrogen	6H6		CD15	Biolegend	HI98		CD135	Biolegend	BV10A4H2		CD16	Biolegend	3G8		CD4	Biolegend	OKT4		CXCR3	BD	1C6/CXCR3		CXCR3	BD	1C6/CXCR3		CXCR3	BD	1C6/CXCR3
CD143	BioLegend	5-369		CD14	Biolegend	M5E2		CD16	Biolegend	3G8		CD14	Miltenyi	Tük4		CD163	BD	GHI/61		CD45RA	Biolegend	HI100		CXCR5	Biolegend	J52D4		CXCR5	Biolegend	J52D4		CXCR5	Biolegend	J52D4
CD15	Biolegend	HI98		CD141	Biolegend	M80		CD163	BD	GHI/61		CD141	Biolegend	M80		CD19	Biolegend	HIB19		CD69	Biolegend	FN50		CD25	Biolegend	M-A251		CD25	Biolegend	BC96		CD25	Biolegend	M-A251
CD16	Biolegend	3G8		CD143	BioLegend	5-369		CD19	Biolegend	HIB19		CD15	Biolegend	HI98		CD1c	Biolegend	L161		CD88	Biolegend	S5/1		HLA-DR	Biolegend	L243		HLA-DR	Biolegend	L243		HLA-DR	Biolegend	L243
CD163	BD	GHI/61		CD15	Biolegend	HI98		CD1c	Biolegend	L161		CD16	Biolegend	3G8		CD20	Biolegend	2H7		CD89	Biolegend	A59		PD-1	Biolegend	EH12.2H7		PD-1	Biolegend	EH12.2H7		PD-1	Biolegend	EH12.2H7
CD19	Biolegend	HIB19		CD16	Biolegend	3G8		CD20	Biolegend	2H7		CD163	BD	GHI/61		CD4	OKT4	Biolegend		CTV	ThermoFisher			CD38	Biolegend	HIT2		CD38	Biolegend	HIT2		CD38	Biolegend	HIT2
CD1c	Biolegend	L161		CD163	BD	GHI/61		CD274	ThermoFisher	B7-H1		CD19	Biolegend	HIB19		CD45RA	eBioscience	HI100		Fixable Viability Kit	Biolegend			CD138	Biolegend	MI15		CD138	Biolegend	MI15		CD138	Biolegend	MI15
CD20	Biolegend	2H7		CD19	Biolegend	HIB19		CD3	Biolegend	SK7		CD1c	Biolegend	L161		CD5	BioLegend	IL17F12		HLA DR	Biolegend	L243		CD27	Biolegend	Q323		CD27	Biolegend	Q323		CD27	Biolegend	Q323
CD3	Biolegend	SK7		CD1c	Biolegend	L161		CD33	BD	WM53		CD20	Biolegend	2H7		CD56	Biolegend	MEM-188		PD1	Biolegend	EH12.2H7		CD20	Biolegend	2H7		CD20	Biolegend	2H7		CD20	Biolegend	2H7
CD33	BD	WM53		CD20	Biolegend	2H7		CD5	BioLegend	IL17F12		CD3	Biolegend	SK7		CD66b	Biolegend	G10F5						CCR6	Biolegend	G034E3		CCR6	Biolegend	G034E3		CCR6	Biolegend	G034E3
CD40	ThermoFisher	5C3		CD3	Biolegend	SK7		CD56	Biolegend	MEM-188		CD33	BD	WM53		CD8	Biolegend	SK1						CD56	Biolegend	MEM-188		CD56	Biolegend	MEM-188		CD56	Biolegend	MEM-188
CD5	BioLegend	IL17F12		CD301	NovusBiologicals			CD66b	Biolegend	G10F5		CD34	Biolegend	P67.6		CD86	Biolegend	IT2-2						CD14	Biolegend	63D3		CD14	Biolegend	63D3		CD14	Biolegend	63D3
CD56	Biolegend	MEM-188		CD33	BD	WM53		CD80	BD	L307.4		CD45RA	Biolegend	HI100		CD88	Biolegend	S5/1						CD16	Biolegend	3G8		CD16	Biolegend	3G8		CD16	Biolegend	3G8
CD66b	Biolegend	G10F5		CD40	ThermoFisher	5C3		CD86	Biolegend	IT2-2		CD56	Biolegend	MEM-188		CD89	Biolegend	A59						CD19	Biolegend	HIB19		CD19	Biolegend	HIB19		CD19	Biolegend	HIB19
CD86	Biolegend	IT2-2		CD5	BioLegend	IL17F12		CD88	Biolegend	S5/1		CD66b	Biolegend	G10F5		Fixable Viability Kit	Biolegend							Fixable Viability Kit	Biolegend			Fixable Viability Kit	Biolegend			Fixable Viability Kit	Biolegend
CD88	Biolegend	S5/1		CD56	Biolegend	MEM-188		CD89	Biolegend	A59		CD88	Biolegend	S5/1		HLA DR	Biolegend	L243						IgD	Biolegend	IA6-2		IgD	Biolegend	IA6-2		IgD	Biolegend	IA6-2
cd89	Biolegend	A59		CD66b	Biolegend	G10F5		Fixable Viability Dye	eBioscience			CD89	Biolegend	A59										IgM	BD	G20-127		IgM	BD	G20-127		IgM	BD	G20-127
CX3CR1	Biolegend	2A9-1		CD86	Biolegend	IT2-2		HLA DR	Biolegend	L243		Fixable Viability Dye	eBioscience															CCR4	Biolegend	L291H4		CD127	Biolegend	A019D5
CXCR3	BD	1C7		CD88	Biolegend	S5/1		ki67	Biolegend	Ki67		HLA DR	Biolegend	L243																		CCR7	Biolegend	G043H7
Fixable Viability Dye	eBioscience			cd89	Biolegend	A59						Ki67	Biolegend	Ki67
HLA DR	Biolegend	L243		CX3CR1	Biolegend	2A9-1						Siglec1	Biolegend	7-239
PDL1	ThermoFisher	B7-H1		CXCR3	BD	1C7
Siglec1	Biolegend	7-239		Fixable Viability Dye	eBioscience
TREM-1	BD	193015		HLA DR	Biolegend	L243
XCR1	BioLegend	S15046E		PDL1	ThermoFisher	B7-H1
				XCR1	BioLegend	S15046E
